# Supplementary material for: Optimization of Long-Acting Bronchodilator Dose Ratios Using Isolated Guinea Pig Tracheal Rings for Synergistic Combination Therapy in Asthma and COPD
Source: MDPI journal article supplement (doi:10.3390/ph15080963), 2022-08-03
Supplement: s1 [file s1]

Supplementary Material

# Optimization of long-acting bronchodilator dose ratios using isolated guinea pig tracheal rings for synergistic combination therapy in asthma and COPD

**Table S1:** Percentages of tracheal relaxation obtained with increasing percentages of the vehicle DMSO.

|                     | Relaxation (%E <sub>max</sub> of 1 mM atropine on contraction by 10 $\mu$ M MCh) |           |          |         |         |        |       |      |
|---------------------|----------------------------------------------------------------------------------|-----------|----------|---------|---------|--------|-------|------|
| DMSO (%)            | 0.00000025                                                                       | 0.0000025 | 0.000025 | 0.00025 | 0.00075 | 0.0025 | 0.025 | 0.25 |
| Mean relaxation (%) | 2                                                                                | 6         | 9        | 13      | 6       | 18     | 21    | 21   |
| SD (%)              | 2                                                                                | 3         | 6        | 7       | 8       | 8      | 9     | 9    |
| SEM (%)             | 1                                                                                | 1         | 2        | 3       | 3       | 3      | 4     | 4    |
| NB                  | 6                                                                                | 6         | 6        | 6       | 6       | 6      | 6     | 6    |
